# Supplementary material for: Impact of transport model resolution and a-priori assumptions on inverse modeling of Swiss F-gases emissions
Source: Copernicus journal article supplement (doi:10.5194/acp-2022-723), 2023-02-03
Supplement: Supplementary file [file acp-2022-723-AC1-supplement.pdf]

## Reply to comments by referee 1

Referee comments in black.

Replies in blue.

*Suggested changes to text in italic green.*

The paper presents inverse modelling results using atmospheric transport models at varying spatial resolution. It is certainly of interest to the scientific community. In general the paper is well written, and I recommend publication after the following minor concerns have been addressed.

We would like to thank the referee for the detailed comments and overall favorable evaluation of our manuscript. We have addressed all questions in the following and modified the manuscript accordingly.

General Comments:

Regarding the sensitivity of inversion results to the assumed a priori emission distribution, it should be discussed a bit more why the inversion is not able to adjust and correct the spatial pattern. Which part is related to station density (coverage of the combined sensitivity) and which part is related to the lack of flexibility via the a priori uncertainty? It is a good suggestion to use different prior estimates with different spatial patterns, but then it needs to be ensured that those different estimates actually cover the range of possible distributions.

In the results of the manuscript a paragraph is already devoted to this comment:

*"Our sensitivity inversions with a set of different a-priori highlight the importance of prior knowledge of the distribution of these emissions on a national level. If we start from an unrealistic distribution, the inversion will not be able to depict the true emissions and their true spatial distribution. This can be seen in our inversions; the results for all HFCs and SF6 are subpar when a uniform a-priori spatial distribution of the emissions is employed. The data themselves (likelihood function  $P(\mathbf{y}|\mathbf{x})$ ) are not enough to drive the inversion to the true emission state when the a-priori spatial distribution of the emissions is unrealistic. Therefore, when the spatial distribution of the emissions on a national level is not known, a different set of spatial distributions should be tested"*

Concerning to the a-priori uncertainty, we are using already too large uncertainties and as a result give room to the inversion to make big adjustments of emissions. The problem - I don't really like the word problem since this is how the mathematical framework works - lies in the Bayesian Inversion itself and in the nature of the a-priori. Most of the a-priori distributions used in Bayesian Inversions are informative (they express specific, definite information about a variable) and they drive the inversions by changing the shape of the cost function ([Prior Probabilities](#)). That's why one should either use an a-priori as uninformative as possible (which is difficult and it's a whole branch of mathematics trying to

produce uninformative priors) or should start from a a-priori distribution which is close to the reality, and they are confident with. The only way a bad a-priori can be overcome is by using a super-dense measurement network, which is also non-feasible. The Bayesian inversion works by minimizing a cost function, and the cost is the difference of the true distribution,  $\mathbf{x}$ , from the a-priori,  $\mathbf{x}_b$ , and the difference between the measurements,  $\mathbf{y}$ , from the model value,  $\mathbf{M}\mathbf{x}$  (Brasseur and Jacob 2017). In the Bayesian inversion, which is assumed to be a linear model, the cost function is convex - meaning that there is only one solution to the minimization problem – but the shape of the convex function, and hence the minimum, is highly influenced by the a-priori distribution. That's why - and since we don't have unlimited and perfect measurements – we should start from an a-priori which is close to the real distribution, or we should try different a-priori distributions, as we did, and discard the results which look unrealistic using robust arguments, something we also did in our paper. One of the main conclusions of the paper is that expert judgement is very important in these inversions since a bad a-priori could lead to an unrealistic a-posteriori distribution and to an overall bad model which could probably possess very good statistical metrics.

#### Specific comments

Lines 51-54: It was actually Lin et al (2003) who showed this for the first time.

Thank you, we changed the reference to (Lin et al. 2003; Seibert and Frank, 2004; Thomson and Wilson, 2012).

Lines 58-66: Errors in inversions and in transport have been discussed in the literature prior to 2018, please cite earlier studies.

The two cited papers were not meant to be exclusive. However, as the report by Bergamaschi et al. (2018) gives a broad overview of inverse modelling approaches for different greenhouse gases and scales, we thought it well suited here. We added "e.g." to the citation, to point out that these are only examples and we are aware of it. Furthermore, we added Lin and Gerbig 2005 and Lauvaux et al., 2009 to mention two other important examples.

Line 89: reference Bergamaschi et al., change year from 2017 to 2022

Thank you for spotting this mistake. Since the manuscript was published in its final version in the meantime, we updated the reference anyway.

Line 331: change "a-posterior" to "a-posteriori".

Done.

Line 345: add a comma between the indices in the subscript (as in Eq. 12)

Done.

Line 349: a temporal correlation length of 0.01 days would only have an impact if the observations would be at a higher rate than about 1/hour. Is this the case? May be this should be mentioned clearly. It is not so clear that representation and model errors are uncorrelated between e.g. subsequent days or even hours, so this might need additional explanation or discussion.

It was already stated "... *that there is very low autocorrelation between daily average observations...*". To explain this more clearly we reworded as follows:

*"... that we assume almost zero auto-correlation (independency) between daily average observation/model errors. Although this may underestimate the true error correlation in some situations, in our experience it allows capturing pronounced pollution events more realistically in the a posteriori simulations."*

Table 2: SEAS1 and SEAS2 have identical entries in the table, may be mention in a footnote to table 2 what the difference is.

The difference was described in the text (L455ff). However, we added a footnote to the table to make it more self-explanatory.

*"\*: Two different approaches for setting covariance parameters were used for the seasonal inversions. See text for details."*

Line 458: please briefly explain the iterative approach here, what is iterated? Are simply posterior residuals used to inform on model-data mismatch error?

We added the following statement for additional explanation:

*"In the latter, the model-data error is first determined from the residuals of the a priori simulation, fitting a linear relationship to the residuals depending on a priori simulated concentrations. For subsequent iterations, the a posteriori residuals from the previous iteration are used instead. The method usually converges after 2-3 iterations."*

Lines 484-486: What are typical scales for near- vs. far-field? This needs to be elaborated a bit more. To me it is unclear why in the far-field the diffusion should be depending on the size of the eddies, certainly at some distance the main cause of "diffusion" is the loss of correlation (or coherence) in the mean wind fields.

In my PhD thesis (<https://www.research-collection.ethz.ch/handle/20.500.11850/578641> on page 22-23) the mean square displacement of a particle is given by equation 2.15 both for near- and far-field (screenshot is also attached below). These equations are derived by starting from the generic equation for the mean square displacement (see Csanady 1977 Turbulent diffusion in the environment for a thorough and analytic mathematical treatment) and assuming that the near field is the region with  $t \ll$  than the Lagrangian timescale and the far field where  $t \gg$  than the Lagrangian timescale. For times much lower than the Lagrangian timescale, equation 2.17 (Lagrangian autocorrelation function) has

a value of 1 and the integral of equation 2.16 below is equal to  $t$  leading to the upper branch of equation 2.15. This equation is independent of the Lagrangian timescales and the displacement of the particle depends only on time; hence the turbulence is independent of the size of eddies. There is a caveat here though. Since the near- and far-field dispersion is defined according to the Lagrangian timescales, for eddies in the Kolmogorov length scales the Lagrangian timescales will be very small, and as a result the near field will be very brief- order of milliseconds. For large eddies with large TLs the near-field can be in the order of a minute or so. Apart from Csanady et al, the concept is very well described in the following "book" on pages 24-26: [Turbulent Diffusion](#)

The content of the sentence in the manuscript was enhanced and a citation was added.

"This happens because turbulent dispersion behaves differently in the near- and the far-field. In the near-field, dispersion approaches isotropy mainly at the large scales, meaning that the diffusion in the near-field is independent of the size of the eddies. During that phase, the size of the plume is much smaller than the larger turbulent eddies, and turbulence acts more like a mean transport mechanism (Csanady 1973)."

Line 494: remove comma after "overfitting"

Done.

Line 519: add "." at the end of the line sentence

Done.

Line 524: When I calculate the relative uncertainties, I get 12.5% and 18.8% for Base1 and Base7 respectively. Please correct

Done.

Figure 6 caption: e) and f) are missing

We changed the caption to Figure 6 to:

*A-posteriori minus a-priori emission differences for HFC-134a for the BASE inversion with the 7 km model (a, c, e) and the 1 km model (b, d, f) starting from a population-based a-priori (a, b), a spatially uniform a-priori (c, d), and an elevation-based a-priori (e, f).*

Line 542: Is it not expected that the reduced chi-square values are always close to 1 given that uncertainty covariance parameters are estimated using maximum likelihood?

Indeed, this is the expectation if the maximum likelihood search worked correctly. In addition, we force the state vector to a positive solution by adjusting the a-priori uncertainty in grid cells with negative a-priori results. This step follows the maximum likelihood search and, hence, a-priori covariance may have changed from what was used in the likelihood optimization.

**Commented [hes1]:** Just give a proper reference here. Not a link. Add to the list of references.

Line 553: "rational state" not clear why that would not be rational, given the (wrong) prior, that is the solution one retrieves using a completely rational approach.

We agree and replaced the word 'rational' by 'realistic'.

Line 569: why is the uncertainty for the SEAS2 inversion results for JJA not given? It would also be interesting to discuss if the seasonality in retrieved fluxes is significant.

Thanks for spotting the missing uncertainty. We added the value to the text. It now reads 364 +/- 92 Mg yr<sup>-1</sup>). We also added the following statement concerning the significance of the seasonality.

*"Given the relatively large a-posteriori uncertainties on seasonal emissions, summer and winter emissions are significantly different at the 95 % confidence level for the SEAS1 inversions but not for the SEAS2 inversions."*

Line 577: It would be interesting to see if taking into account seasonality improves the performance (e.g. using statistics as shown in Table 3). Not allowing for seasonal variations in combination with seasonal changes in transport patterns can be expected to result in larger model-data mismatch error.

Indeed, the model performance at the two Swiss Plateau sites was slightly increased when allowing for seasonal variations in the emissions. The performance gain in terms of RMSE was about 10 %. We added the following to the text and an additional table (similar to Table 3) to the supplement.

*"The a-posteriori model performance slightly increased for all seasonal inversion compared to the annual mean, population-based inversions (see supplement table xxx). For the RMSE, the performance increase was in the order of 10 %, but was less pronounced for the correlation coefficient. SEAS2 inversions achieved better performance statistics, but also revealed a chi2 index considerably larger than 1, indicating some degree of overfitting. "*

|          | X2   | DOF | R (BRM) | R (SOT) | RMSE (BRM) | RMSE (SOT) |
|----------|------|-----|---------|---------|------------|------------|
| C7 SEAS1 | 0.89 | 252 | 0.78    | 0.81    | 4.2        | 4.3        |
| C7 SEAS2 | 1.4  | 329 | 0.73    | 0.76    | 4.7        | 4.8        |
| C1 SEAS1 | 0.90 | 199 | 0.85    | 0.85    | 3.5        | 3.9        |
| C1 SEAS2 | 1.3  | 303 | 0.81    | 0.81    | 3.9        | 4.4        |

Line 597 / Table 3: it would be helpful to also have the posterior estimates and uncertainties included.

They are now included in Table 3.

Lines 681-685: It needs to be mentioned that the case of Switzerland is special given the orography. The manuscript has not shown similar impacts of resolution increase in domains with more benign orography.

Indeed, the situation in Switzerland is special because of the orography. However, other world regions deal with similar kinds of complexity that is not necessarily driven by orography alone, but by coastlines, dense population centers in otherwise sparsely populated environments, etc. We slightly reworded the sentence:

*This study highlights the importance of employing high-resolution meteorological fields and a dense observational network to inversely estimate national and sub-national emissions and their spatial distribution in regions with a complex emission distribution. In our case this is a small country of the order of 40,000 km<sup>2</sup> with complex orography. Other examples would be coastal regions or areas with skewed population/emission distributions and local flow patterns.*

Lines 694-695 "While ... uncertainty," the sensitivity is the other way around (emission estimates being sensitive to parameters), please correct.

We corrected as follows:

*While the final emission estimates and their uncertainty did not show any significant sensitivity to most of these parameters, the baseline uncertainty had a significant impact on the final inversion estimate.*

Lines 736-737: May be reformulate "... which is not true for the low-resolution inversions, in which when the uniform distribution is employed the low-resolution inversion fails and produces unrealistic results." e.g. to "... which is not true for the low-resolution inversions, which fails and produces unrealistic results when using the uniform distribution."

We changed the sentence following your suggestion:

*"For this substance, the high-resolution inversions for the three different a-priori utilized can reproduce the same or similar emission regions, which is not true for the low-resolution inversion, which fails and produces unrealistic results when using the uniform distribution."*
